# Supplementary material
Source: publisher site journal article supplement (https://www.dovepress.com/article/501723)
Supplement: Supplementary file 1 [file get_supplementary_file.php]

eAppendix 1. Supplementary Method

The rule of thumb as proposed by Orme suggests that the sample size required for the main effects depends on the number of choice tasks (t), the number of alternatives (a), and the number of analysis cells (c) according to the following equation:

N > 500*c/(t*a)

When considering main effects, ‘c’ is equal to the largest number of levels for any of the attributes. There are up to three levels, nine choice sets and two alternatives in this study. That is, c=3, t=9, and a=2. The sample size for each version needs to be greater than 83. Therefore, the sample size of this study with two versions was at least 168.

In consideration of the response rate and tolerable error, and given that the objective of the study was not to account for heterogeneity of preferences, a sample size of 300 patients was planned to ensure reliable statistical analyses.

eTable1 Attribute pool by literature review

| Category | Attribute | Explanation | Reference |
| --- | --- | --- | --- |
| Outcome attributes | Live birth rate | The rate of live births is the main measure of treatment success. | [1–6] |
|  | Abortion rate | Termination of pregnancy, failure of cycle therapy. | [5] |
|  | Clinical pregnancy rate | Refers to the patient's pregnancy rate per treatment cycle. | [2,7] |
|  | Risk of maternal complications | Refers to the likelihood of maternal complications such as moderate to severe ovarian hyperstimulation syndrome (OHSS), postoperative bleeding, and postoperative pelvic infection. The most serious of these complications is OHSS, which can lead to a range of potential symptoms from moderate abdominal swelling to more severe swelling and abdominal pain to extreme thirst and dyspnea. | [6,7] |
|  | Risk of neonatal complications | Refers to the likelihood of complications such as prematurity (before 37 weeks), low birth weight, and congenital anomalies (birth defects) in newborns. These complications may result in the infant being admitted to the neonatal intensive care unit for some time and in some cases may lead to longer periods of varying severity of health problems. | [5] |
| Process attributes | Number of outpatient visits per month | Number of outpatient visits per month. | [7] |
|  | Health consultation period | Work days or weekends and evenings only. | [7] |
|  | Friendliness of care | Attitude towards patients. | [4,7] |
|  | Online counseling and peer support | Whether telephone or Internet counseling is professional, and whether the care provides peer support (patients with similar experiences help each other in life, social, and psychological aspects). | [2,3] |
|  | Continuity of care | Whether the same doctor or nurse sees each visit. | [2–4] |
|  | Participation in treatment decision making | Refers to the timely communication of the patient's views and concerns to the physician and the participation in the discussion and selection of treatment options. | [6] |
| Economic attributes | Out-of-pocket costs per cycle | Refers to the out-of-pocket expenses of the patient for the treatment. | [2,3,5–7] |

Refernence

1 Cornelisse S, Vos MS, Groenewoud H, *et al.* Women’s preferences concerning IVF treatment: a discrete choice experiment with particular focus on embryo transfer policy. *Human Reproduction Open*. 2022;2022:hoac030. doi: 10.1093/hropen/hoac030

2 Botha W, Donnolley N, Shanahan M, *et al.* Assessment of the societal and individual preferences for fertility treatment in Australia: study protocol for stated preference discrete choice experiments. *BMJ Open*. 2018;8:e020509. doi: 10.1136/bmjopen-2017-020509

3 Keller E, Botha W, Chambers GM. What Features of Fertility Treatment do Patients Value? Price Elasticity and Willingness-to-Pay Values from a Discrete Choice Experiment. *Appl Health Econ Health Policy*. 2023;21:91–107. doi: 10.1007/s40258-022-00764-7

4 Cai QF, Wan F, Dong XY, *et al.* Fertility clinicians and infertile patients in China have different preferences in fertility care. *Human Reproduction*. 2014;29:712–9. doi: 10.1093/humrep/deu023

5 Abdulrahim B, Scotland G, Bhattacharya S, *et al.* Assessing couples’ preferences for fresh or frozen embryo transfer: a discrete choice experiment. *Human Reproduction*. 2021;36:2891–903. doi: 10.1093/humrep/deab207

6 Skedgel C, Ralphs E, Finn E, *et al.* How Do People with Experience of Infertility Value Different Aspects of Assistive Reproductive Therapy? Results from a Multi-Country Discrete Choice Experiment. *Patient*. 2022;15:459–72. doi: 10.1007/s40271-021-00563-7

7 Maeda E, Jwa SC, Kumazawa Y, *et al.* Out-of-pocket payment and patients’ treatment choice for assisted reproductive technology by household income: a conjoint analysis using an online social research panel in Japan. *BMC Health Serv Res*. 2022;22:1093. doi: 10.1186/s12913-022-08474-5

eTable2 Count-based analysis results of the best-worst scaling (BWS)

|  | Best | Worst | Standardized B‐W score | Mean | | |
| --- | --- | --- | --- | --- | --- | --- |
| Best | Worst | Standardized B‐W score |
| Live birth rate | 338 | 3 | 0.65 | 2.62 | 0.02 | 0.65 |
| Clinical pregnancy rate | 270 | 16 | 0.49 | 2.09 | 0.12 | 0.49 |
| Risk of maternal complications | 181 | 19 | 0.31 | 1.40 | 0.15 | 0.31 |
| Abortion rate | 191 | 41 | 0.29 | 1.48 | 0.32 | 0.29 |
| Risk of neonatal complications | 111 | 22 | 0.17 | 0.86 | 0.17 | 0.17 |
| Participation in treatment decision making | 99 | 85 | 0.03 | 0.77 | 0.66 | 0.03 |
| Out-of-pocket costs per cycle | 149 | 160 | -0.02 | 1.16 | 1.24 | -0.02 |
| Friendliness of care | 44 | 182 | -0.27 | 0.34 | 1.41 | -0.27 |
| Continuity of care | 55 | 199 | -0.28 | 0.43 | 1.54 | -0.28 |
| Online counseling and peer support | 32 | 268 | -0.46 | 0.25 | 2.08 | -0.46 |
| Number of outpatient visits per month | 31 | 280 | -0.48 | 0.24 | 2.17 | -0.48 |
| Health consultation period | 22 | 339 | -0.61 | 0.17 | 2.63 | -0.61 |

**Abbreviations:** B-W, best minus worst.

eTable 3 Prior parameters of Bayesian efficient design in discrete choice experiment

| Level | Prior mean | Prior variances |
| --- | --- | --- |
| Live birth rate (35%) | 0.96 | -3.00 |
| Live birth rate (55%) | 1.73 | 0.81 |
| Clinical pregnancy rate (40%) | 0.25 | 1.13 |
| Clinical pregnancy rate (60%) | 1.21 | 1.69 |
| Partially participate in TDM | 1.18 | 0.70 |
| Fully participate in TDM | 1.35 | 0.78 |
| Risk of maternal complications (2.5%) | -0.47 | 1.09 |
| Risk of maternal complications (5%) | -0.45 | -0.83 |
| Risk of neonatal complications (10%) | -0.46 | -0.23 |
| Risk of neonatal complications (15%) | -0.62 | 1.07 |
| Out-of-pocket costs per cycle (¥30000) | -0.28 | 1.35 |
| Out-of-pocket costs per cycle (¥50000) | -0.47 | 2.25 |

eTable 4 Analysis of comprehension complexity between BWS-2 and DCE

| Variable | BWS-2 | DCE | χ2 | PValue |
| --- | --- | --- | --- | --- |
| **Age (years)** |  |  | 3.85 | 0.28 |
| 20-29 | 29 | 43 |  |  |
| 30-34 | 48 | 99 |  |  |
| 35-39 | 34 | 45 |  |  |
| 40-45 | 15 | 17 |  |  |
| **Residence** |  |  | 0.96 | 0.62 |
| Within the city | 32 | 46 |  |  |
| Outside the city | 44 | 82 |  |  |
| Outside the province | 50 | 76 |  |  |
| **Education** |  |  | 8.77 | 0.03 |
| Junior high school and below | 21 | 22 |  |  |
| High school or junior college | 31 | 43 |  |  |
| College or undergraduate | 70 | 116 |  |  |
| Master or doctor | 4 | 23 |  |  |
| **Work** |  |  | 6.70 | 0.83 |
| Work less than 40 hours | 47 | 61 |  |  |
| Work more than 40 hours | 32 | 79 |  |  |
| No work | 47 | 63 |  |  |
| **Average monthly household income** |  |  | 0.79 | 0.67 |
| Less than ¥5000 | 20 | 40 |  |  |
| Between ¥5000 and ¥15000 | 71 | 122 |  |  |
| More than ¥20000 | 25 | 52 |  |  |
| **Pregnancy preparation time** |  |  | 0.82 | 0.84 |
| Less than 2 years | 53 | 77 |  |  |
| Between 3 and 5 years | 55 | 93 |  |  |
| Between 6 and 9 years | 14 | 25 |  |  |
| More than 10 years | 4 | 9 |  |  |
| **Received treatment in the past** |  |  | 0.62 | 0.43 |
| Yes | 81 | 141 |  |  |
| No | 45 | 63 |  |  |
| **Current stage of treatment** |  |  | 0.18 | 0.67 |
| First visit | 12 | 21 |  |  |
| Physical examination | 26 | 46 |  |  |
| Accepting ART | 85 | 132 |  |  |
| Fetal preservation | 3 | 5 |  |  |
| **Factors leading to infertility** |  |  | 7.46 | 0.06 |
| Male | 17 | 15 |  |  |
| Female | 67 | 93 |  |  |
| Both parties | 17 | 39 |  |  |
| Unknown | 25 | 57 |  |  |
| **Self-reported health status** |  |  | 2.78 | 0.10 |
| Very good | 20 | 31 |  |  |
| Good | 52 | 60 |  |  |
| Average | 53 | 110 |  |  |
| Bad | 1 | 2 |  |  |
| Very bad | 0 | 1 |  |  |

eTable 5 Analysis of response preference between BWS-2 and DCE

| Variable | BWS-2 | DCE | χ2 | PValue |
| --- | --- | --- | --- | --- |
| **Age (years)** |  |  | 0.66 | 0.88 |
| 20-29 | 27 | 45 |  |  |
| 30-34 | 48 | 99 |  |  |
| 35-39 | 29 | 50 |  |  |
| 40-45 | 11 | 21 |  |  |
| **Residence** |  |  | 5.15 | 0.08 |
| Within the city | 35 | 43 |  |  |
| Outside the city | 37 | 89 |  |  |
| Outside the province | 43 | 83 |  |  |
| **Education** |  |  | 11.4 | 0.01 |
| Junior high school and below | 24 | 19 |  |  |
| High school or junior college | 28 | 46 |  |  |
| College or undergraduate | 54 | 132 |  |  |
| Master or doctor | 9 | 18 |  |  |
| **Work** |  |  | 2.67 | 0.10 |
| Work less than 40 hours | 33 | 75 |  |  |
| Work more than 40 hours | 36 | 75 |  |  |
| No work | 46 | 64 |  |  |
| **Average monthly household income** |  |  | 0.79 | 0.67 |
| Less than ¥5000 | 20 | 41 |  |  |
| Between ¥5000 and ¥15000 | 71 | 122 |  |  |
| More than ¥20000 | 24 | 52 |  |  |
| **Pregnancy preparation time** |  |  | 4.43 | 0.04 |
| Less than 2 years | 52 | 78 |  |  |
| Between 3 and 5 years | 51 | 97 |  |  |
| Between 6 and 9 years | 9 | 30 |  |  |
| More than 10 years | 3 | 10 |  |  |
| **Received treatment in the past** |  |  | 0.50 | 0.48 |
| Yes | 74 | 148 |  |  |
| No | 41 | 67 |  |  |
| **Current stage of treatment** |  |  | 0.89 | 0.35 |
| First visit | 14 | 19 |  |  |
| Physical examination | 26 | 46 |  |  |
| Accepting ART | 72 | 145 |  |  |
| Fetal preservation | 3 | 5 |  |  |
| **Factors leading to infertility** |  |  | 5.72 | 0.13 |
| Male | 12 | 20 |  |  |
| Female | 65 | 95 |  |  |
| Both parties | 15 | 41 |  |  |
| Unknown | 23 | 59 |  |  |
| **Self-reported health status** |  |  | 0.08 | 0.78 |
| Very good | 17 | 34 |  |  |
| Good | 39 | 73 |  |  |
| Average | 57 | 106 |  |  |
| Bad | 2 | 1 |  |  |
| Very bad | 0 | 1 |  |  |
